# Supplementary material for: [meso-Tetrakis(pentafluorophenyl)porphyrinato]platinum(ii) as an efficient, oxidation-resistant red phosphor: spectroscopic properties and applications in organic light-emitting diodesElectronic supplementary information available: details of photoluminescence measurements, transient absorption spectra of PtF20TPP, photophysical properties of PtF20TPP in different solvents, EL spectra and performances of OLEDs using PtF20TPP as emitters at various doping levels and crystallographic data for PtF20TPP. See http://www.rsc.org/suppdata/jm/b2/b212204a/
Source: Royal Society of Chemistry journal article supplement (doi:10.1039/b212204a), 2003-01-01
Supplement: b212204a.doc [file b212204a.doc]

**[*meso-*Tetrakis(pentafluorophenyl)porphyrinato] Platinum(II) as an Efficient, Oxidation-Resistant Red Phosphor: Spectroscopic Properties and Applications in Organic Light-Emitting Diodes**

Prof. Y. Wang

Key Laboratory for Supramolecular Structure and Spectroscopy of Ministry of Education, Jilin University, Changchun 130023 (China)

Details of photoluminescence measurements; transient absorption spectra of PtF20TPP; photophysical properties of PtF20TPP in different solvents; EL spectra and performances of OLEDs using PtF20TPP as emitters at various doping levels; crystallographic data for PtF20TPP.

**Transient absorption spectra for PtF20TPP in acetonitrile following 355 nm excitation**

**Table.** Photophysical Properties of PtF20TPP in different solvents

| Solvent | em (nm) |  |  (s) |
| --- | --- | --- | --- |
| Hexane | 647 | 0.081 | 52 |
| CH2Cl2 | 648 | 0.088 | 60 |
| Acetonitrile | 647 | 0.084 | 55 |
| MeOH | 647 | 0.045 | 26 |

**EL spectra of Devices 2 (top) and 4 (bottom) at various voltages**

**EL spectra of Devices 14 recorded at 8 V**

Current-voltage and luminance-voltage characteristics of Devices 2 (top) and 4 (bottom)

***Crystal data***: Formula: [PtF20TPP](H2O)0.33, [C44 H8.67 F20 N4 O0.33 Pt]; formula weight = 1173.64, rhombohedral, R -3, a = 14.2727(16) Å,= 88.309(17)°,V = 2903.8(6) Å3, Z = 3, Dc = 2.013 g cm-3, (Mo-K) = 3.764 mm-1, F(000) = 1684, T = 301 K.

***Data collection***: A crystal of dimensions 0.4 × 0.3 × 0.1 mm mounted in a glass capillary was used for data collection at 28oC on a MAR diffractometer with a 300 mm image plate detector using graphite monochromatized Mo-K radiation ( = 0.71073 Å). Data collection was made with 2o oscillation steps of , 300 seconds exposure time and scanner distance at 120 mm. 100 images were collected.

***Data reduction***: The images were interpreted and intensities integrated using program DENZO [[1]](#footnote-2) .

***Structure solution***: The structure was solved by direct methods employing SHELXS-97 program[[2]](#footnote-3) on PC. Almost all atoms except the water molecule were located according to the direct methods. The position of the O atom was found after successful refinement by full-matrix least-squares using program SHELXL-97 [[3]](#footnote-4) on PC.

***Structure refinement***: According to the SHELXL-97 program,3 all 3553 independent reflections (Rint [[4]](#footnote-5) equal to 0.0697, 2780 reflections larger than 4(Fo)) from a total 19190 reflections were participated in the full-matrix least-square refinement against F2. These reflections were in the range -17<=h<= 17, ‑17<=k<= 17, -15<=l<= 15 with 2 max equal to 51.06o.

One crystallographic asymmetric unit consists of one half of formula unit, inclusive one third of water molecule. In the final stage of least-squares refinement, all non-hydrogen atoms were refined anisotropically. H atoms except those on O of water molecule are generated by program SHELXL-97. The positions of H atoms are calculated based on riding mode with thermal parameters equal to 1.2 times that of the associated C atoms, and participated in the calculation of final R-indices[[5]](#footnote-6).

Convergence (( /)max = 0.001, av. 0.001) for 315 variable parameters by full-matrix least-squares refinement on F2 reaches to R1 = 0.0336 and wR2 = 0.0848 with a goodness-of-fit of 0.994, the parameters a and b for weighting scheme are 0.0639 and 0.0. The final difference Fourier map shows maximum rest peaks and holes of 0.482 and -1.037 eÅ-3 respectively.

***Drawing***: The ORTEP [[6]](#footnote-7) drawing of the molecule was made with thermal ellipsoids at the 30 % probability level.

1. Otwinowski, Z. and Minor, W., “Processing of X-ray Diffraction Data Collected in Oscillation Mode”, Methods in Enzymology, Volume 276: Macromolecular Crystallography, part A, p. 307-326, 1997. Carter C. W., Sweet Jr. & R. M., Eds., Academic Press. [↑](#footnote-ref-2)
2. SHELXS97, Sheldrick, G. M. (1997). SHELX97. Programs for Crystal Structure Analysis (Release 97-2). University of Goetingen, Germany. [↑](#footnote-ref-3)
3. SHELXL97, Sheldrick, G. M. (1997). SHELX97. Programs for Crystal Structure Analysis (Release 97-2). University of Goetingen, Germany. [↑](#footnote-ref-4)
4. Rint = | Fo2- Fo2(mean) | / [ Fo2] [↑](#footnote-ref-5)
5. Since the structure refinements are against F2, R-indices based on F2 are larger than (more than double) those based on F. For comparison with older refinements based on F and an OMIT threshold, a conventional index R1 based on observed F values larger than 4(Fo) is also given (corresponding to Intensity2(I)). wR2 = { [ w( Fo2– Fc2)2] / [ w(Fo2)2] }1/2, R1 = ||Fo| – |Fc|| / |Fo|, The Goodness of Fit is always based on F2: GooF = S = { [ w( Fo2– Fc2)2] / ( n– p) }1/2, where n is the number of reflections and p is the total number of parameters refined. The weighting scheme is: w = 1/[2(Fo2) + (*a*P)2+ *b*P ], where P is [ 2 Fc2+ Max( Fo2,0) ]/3. [↑](#footnote-ref-6)
6. ORTEP3 for Windows - Farrugia, L. J. (1997) J. Appl. Cryst. 30, 565. [↑](#footnote-ref-7)
